# Supplementary material
Source: PubMed Central journal article supplement (PMC7541766)
Supplement: NIHMS1619034-supplement-1.pdf [file NIHMS1619034-supplement-1.pdf]

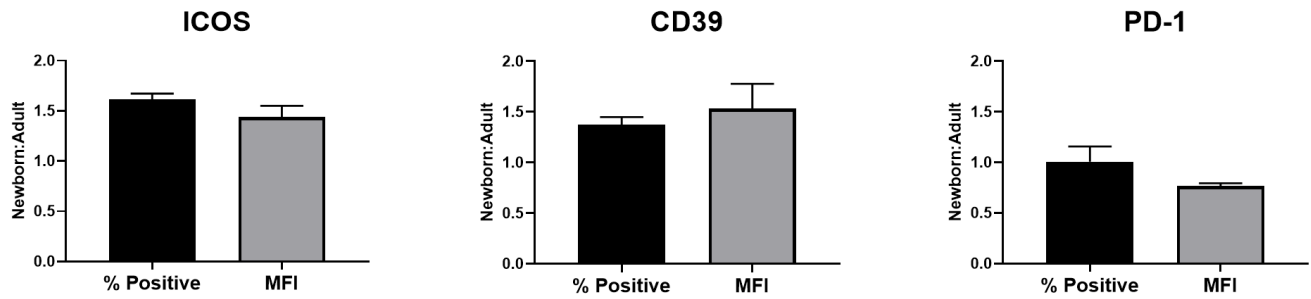

**SF1. Comparison of percentage and level of expression of markers in newborn and adult Tregs stimulated with 1µg/ml anti-CD3.** On d4 following stimulation with 1µg/ml anti-CD3 and anti-CD28, cultures were evaluated for the percent of CD3<sup>+</sup>FoxP3<sup>+</sup> cells expressing each marker along with the level of expression (MFI) on positive cells. An adult and newborn animal were done in parallel in each experiment. The average of the ratio of newborn to adult animals for each experiment is shown.
